# Supplementary material
Source: publisher figshare collection journal article supplement (https://acs.figshare.com/ndownloader/files/13163915)
Supplement: Supplementary file 1 [file 13163915]

## **Supporting Information**

### **Untemplated Resveratrol-Mediated Polydopamine Nanocapsule Formation**

Devang R. Amin<sup>1,2</sup>, Cody J. Higginson<sup>1</sup>, Angie Korpusik<sup>1</sup>, Alyse R. Gonthier<sup>1</sup>, Phillip B. Messersmith<sup>1,3,\*</sup>

<sup>1</sup> Departments of Bioengineering and Materials Science and Engineering  
University of California, Berkeley  
210 Hearst Mining Building, Berkeley, CA 94720 United States

<sup>2</sup> Department of Biomedical Engineering  
Northwestern University  
2145 Sheridan Rd, Evanston, IL 60208 United States

<sup>3</sup> Materials Science Division  
Lawrence Berkeley National Laboratory  
Berkeley, CA 94720 United States

---

\* Corresponding author: email: [philm@berkeley.edu](mailto:philm@berkeley.edu); ph: 510-643-9631

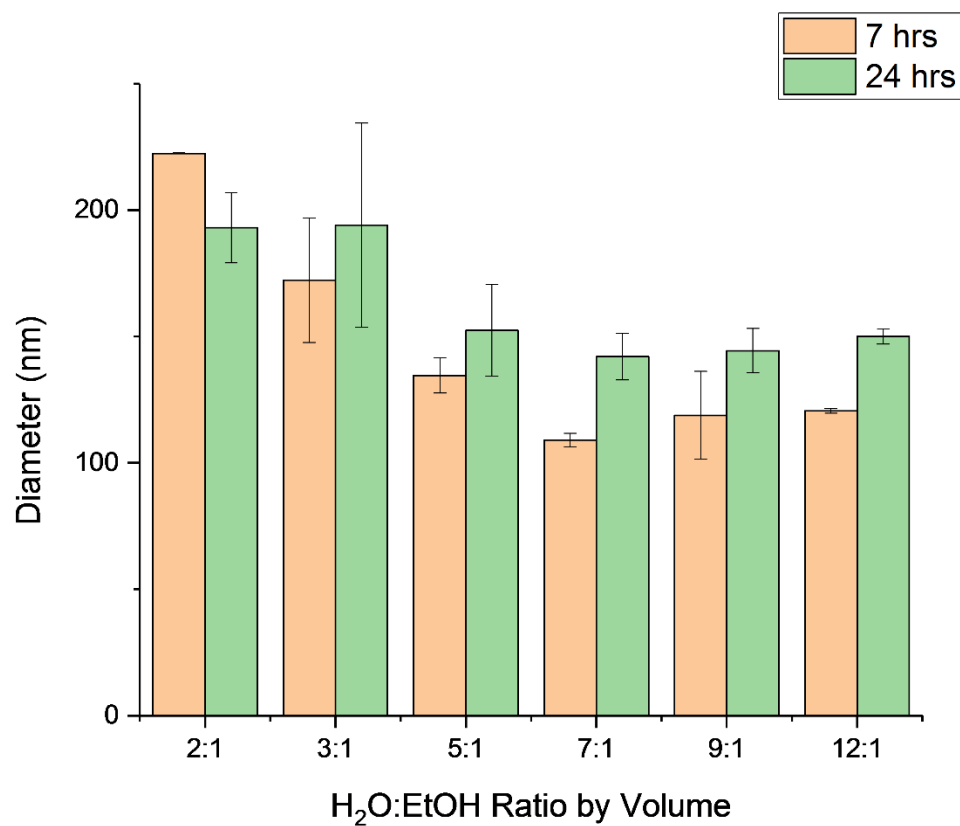

**Figure S1:** Hydrodynamic diameters of RV@PDA in solutions containing 0.125 mg/mL RV and 0.25 mg/mL DA after 7 h and 24 h of NP growth at various water:ethanol volume ratios. (Data collected from two independently prepared samples at each condition.)

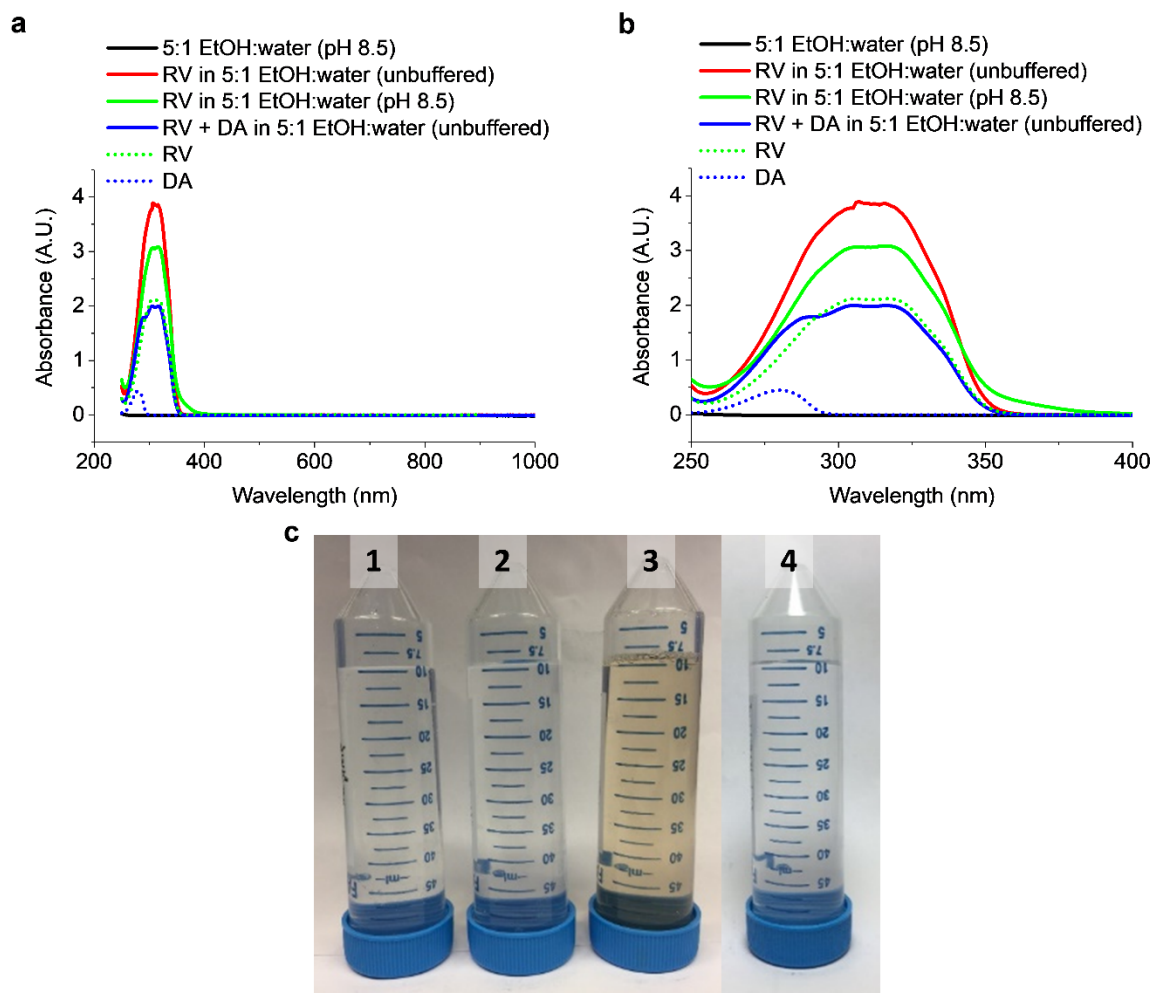

**Figure S2:** Visual and spectroscopic evaluation of RV and DA control solutions after 24h. **(a)** UV-Vis absorbance spectra of 0.25 mg/mL RV in 5:1 EtOH:water with or without pH 8.5 buffer and 0.125 mg/mL RV + 0.125 mg/mL DA in 5:1 EtOH:water after 24h. Spectra of freshly prepared 0.125 mg/mL RV and 0.25 mg/mL DA solutions in 5:1 EtOH:water are provided for reference. All solutions diluted 8 before obtaining spectra. **(b)** Spectra in **(a)** within the 250 nm – 400 nm wavelength range. **(c)** Visual appearance of 5:1 EtOH:water without buffer **(1)**, 250 µg/mL RV in 5:1 EtOH:water without buffer **(2)**, 250 µg/mL RV in 5:1 EtOH:water with pH 8.5 buffer **(3)**, and 250 µg/mL DA + 125 µg/mL RV in 5:1 EtOH:water without buffer.

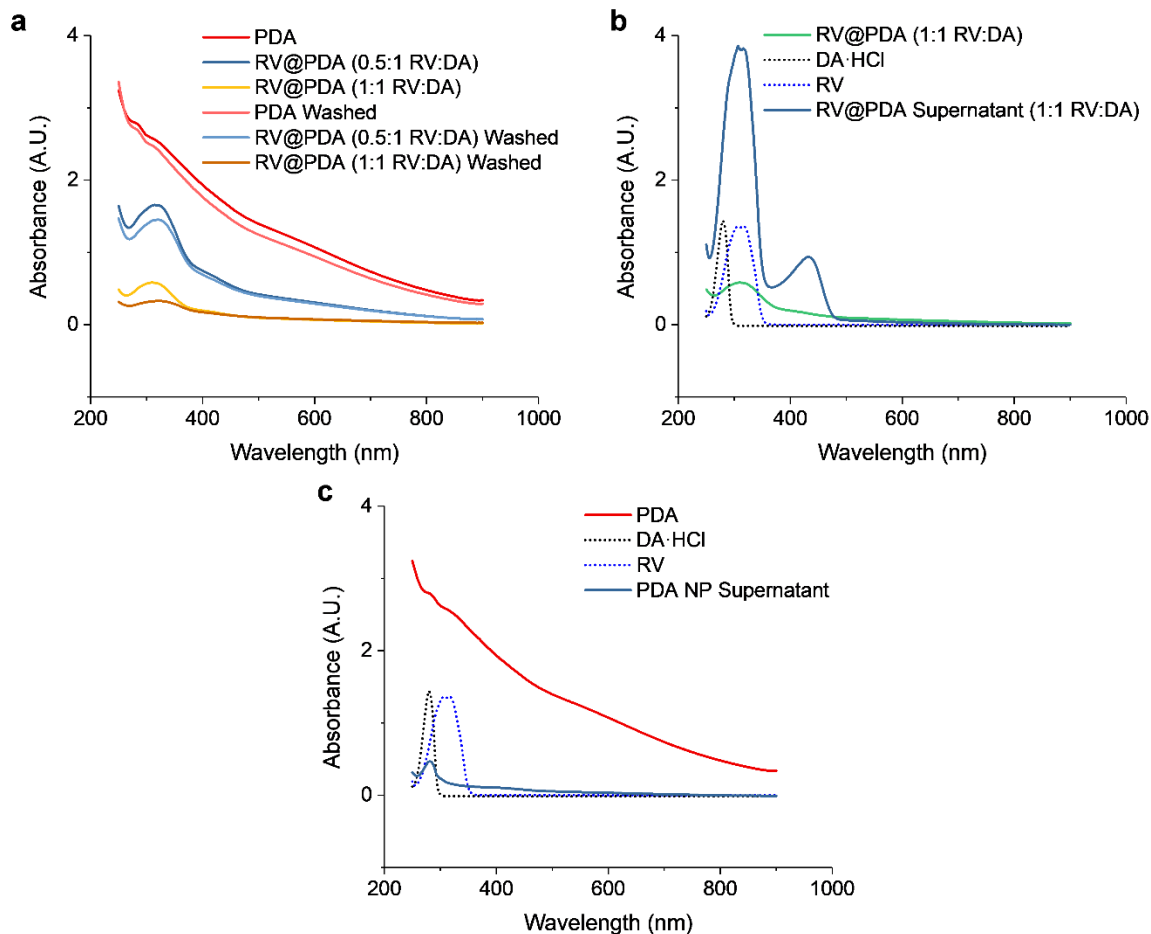

**Figure S3:** UV-Vis absorbance spectroscopy of PDA and RV@PDA. **(a)** Effect of washing nanomaterial product: spectra of pure PDA and RV@PDA before and after a third round of centrifugation. **(b-c)** Analysis of supernatants separated from pure PDA and RV@PDA product by centrifugation: **(b)** Spectra of pure RV@PDA prepared from 1:1 RV:DA in growth solution and the corresponding supernatant. **(c)** Spectra of pure PDA and the corresponding supernatant.

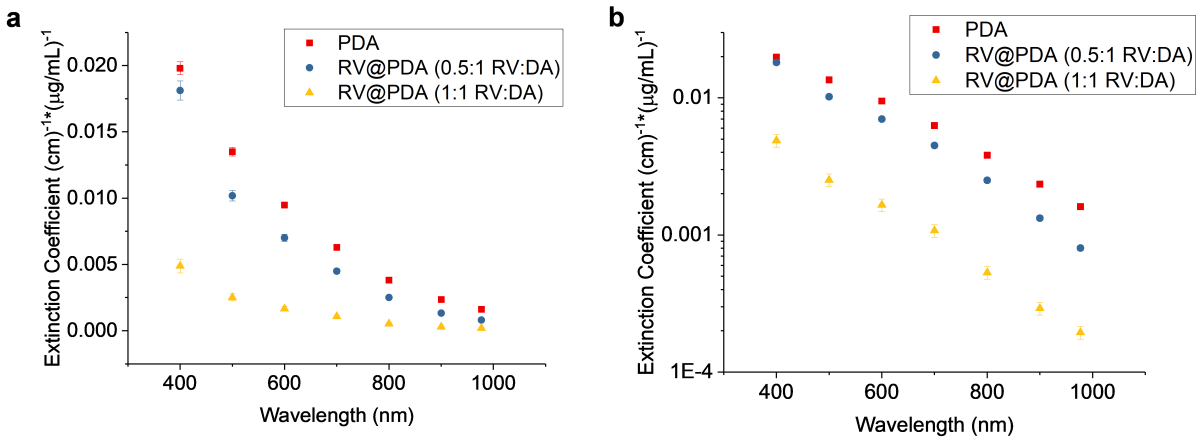

**Figure S4:** Extinction coefficients of PDA and RV@PDA from 400 nm – 977 nm. RV@PDA was prepared with either a 0.5:1 or 1:1 RV:DA mass ratio. **(a)** Extinction coefficients plotted vs. wavelength plotted with a linear y-axis. **(b)** Extinction coefficients vs. wavelength plotted with a logarithmic scale. Error bars represent the propagation of uncertainty in particle concentration.

| Wavelength (nm) | PDA                                           | RV@PDA (0.5:1 RV:DA)                          | RV@PDA (1:1 RV:DA)                            |
|-----------------|-----------------------------------------------|-----------------------------------------------|-----------------------------------------------|
| <b>400</b>      | $1.98 \times 10^{-2} \pm 4.74 \times 10^{-4}$ | $1.81 \times 10^{-2} \pm 7.17 \times 10^{-4}$ | $4.88 \times 10^{-3} \pm 5.18 \times 10^{-4}$ |
| <b>500</b>      | $1.35 \times 10^{-2} \pm 3.23 \times 10^{-4}$ | $1.02 \times 10^{-2} \pm 4.03 \times 10^{-4}$ | $2.51 \times 10^{-3} \pm 2.66 \times 10^{-4}$ |
| <b>600</b>      | $9.47 \times 10^{-3} \pm 2.27 \times 10^{-4}$ | $7.00 \times 10^{-3} \pm 2.77 \times 10^{-4}$ | $1.65 \times 10^{-3} \pm 1.75 \times 10^{-4}$ |
| <b>700</b>      | $6.29 \times 10^{-3} \pm 1.50 \times 10^{-4}$ | $4.49 \times 10^{-3} \pm 1.78 \times 10^{-4}$ | $1.07 \times 10^{-3} \pm 1.14 \times 10^{-4}$ |
| <b>800</b>      | $3.82 \times 10^{-3} \pm 9.14 \times 10^{-5}$ | $2.50 \times 10^{-3} \pm 9.90 \times 10^{-5}$ | $5.31 \times 10^{-4} \pm 5.63 \times 10^{-5}$ |
| <b>900</b>      | $2.34 \times 10^{-3} \pm 5.61 \times 10^{-5}$ | $1.32 \times 10^{-3} \pm 5.24 \times 10^{-5}$ | $2.92 \times 10^{-4} \pm 3.09 \times 10^{-5}$ |
| <b>977</b>      | $1.61 \times 10^{-3} \pm 3.85 \times 10^{-5}$ | $8.03 \times 10^{-4} \pm 3.18 \times 10^{-5}$ | $1.94 \times 10^{-4} \pm 2.06 \times 10^{-5}$ |

**Table S1:** Extinction coefficients (mean  $\pm$  SD) plotted in Figure S3 for PDA and RV@PDA. Units are  $\text{cm}^{-1} * (\mu\text{g/mL})^{-1}$ .

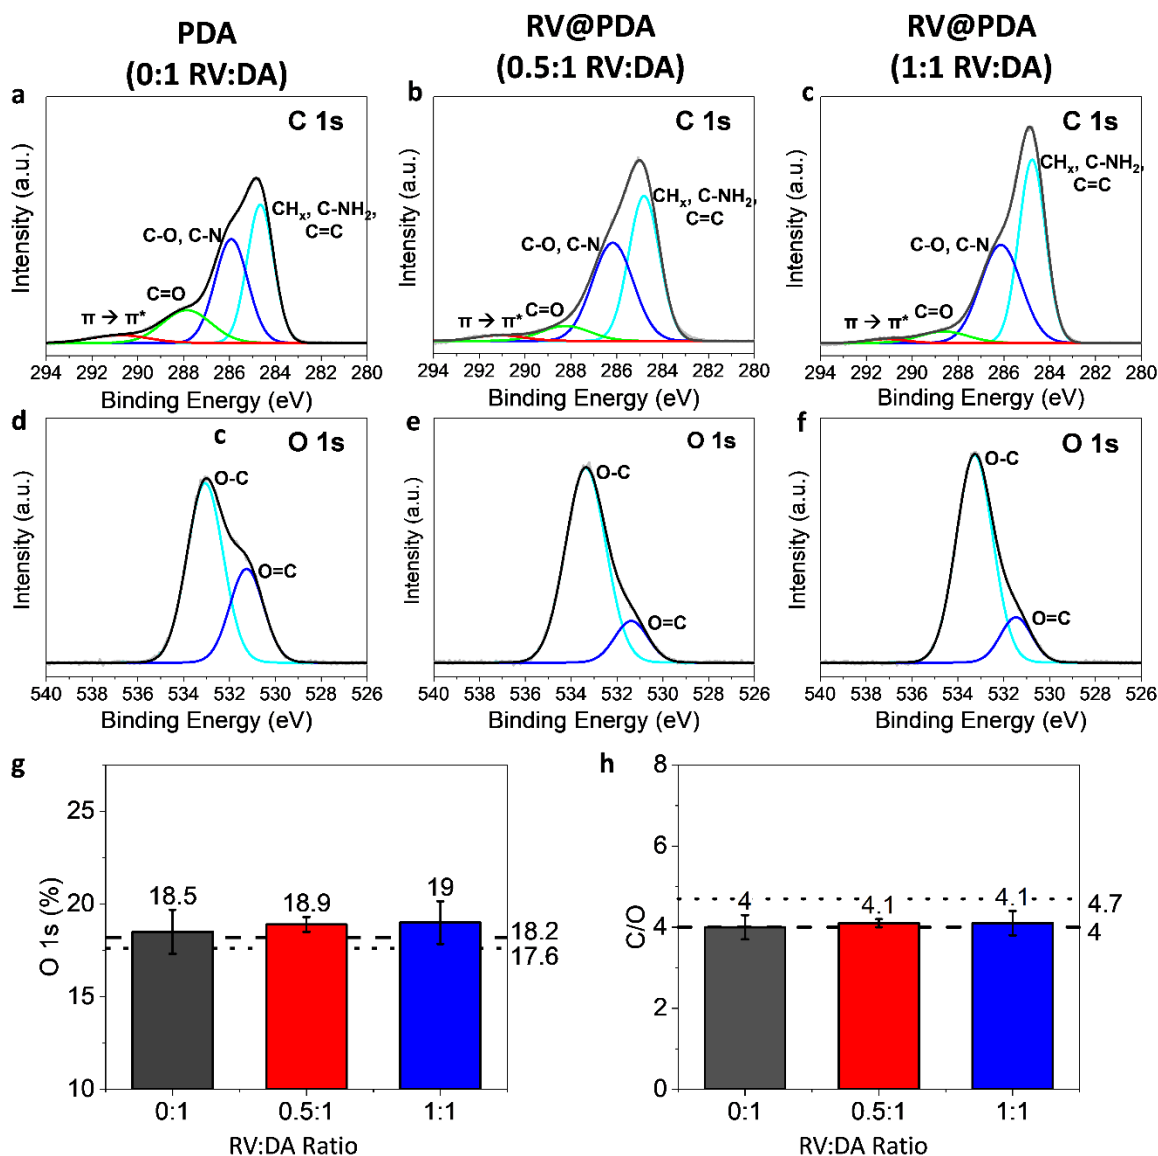

**Figure S5:** Analysis of high resolution XPS scans of PDA and RV@PDA nanomaterials. (a-c) C 1s peaks of PDA NPs (0:1 RV:DA) (a), RV@PDA with 0.5:1 RV:DA (b), and RV@PDA with 1:1 RV:DA (c). The deconvolution of this peak is shown, with energies corresponding to  $\pi$ - $\pi^*$  transition, C=O bonds, C-O and C-N bonds, and  $\text{CH}_x$ , C-NH<sub>2</sub>, and C=C bonds labeled. (d-f) O 1s peaks of PDA (d), RV@PDA with 0.5:1 RV:DA (e), and RV@PDA with 1:1 RV:DA (f). Deconvolution into O-C and O=C bonding components is shown. (g) at% O calculated from analysis of high resolution O 1s scans relative to total C, N, and O content. (h) C/O atomic ratios calculated from high resolution C 1s and O 1s scans. Theoretical values of at% O and C/O ratio for DA (dashed lines) and RV (dotted lines) are shown for reference (g-h).

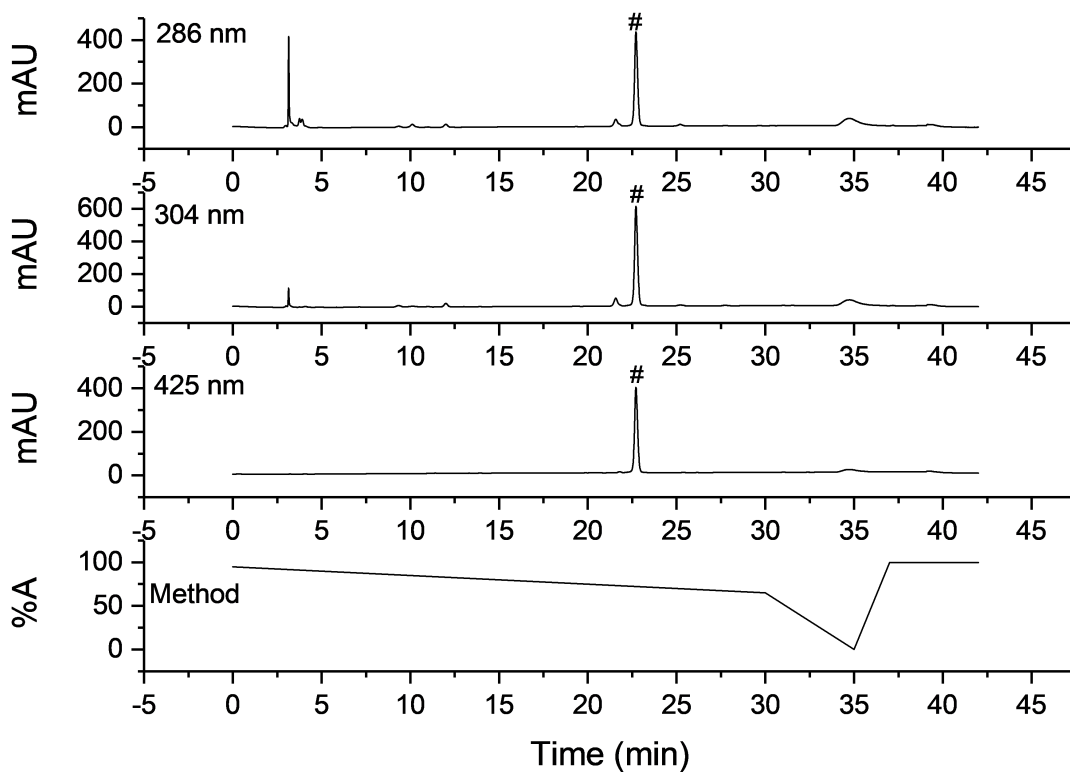

**Figure S6:** HPLC chromatographs of supernatant separated from RV@PDA nanomaterials (1:1 RV:DA) following 24h synthesis. Readouts from three UV-Vis detection wavelengths (286 nm, 304 nm, and 425 nm) are shown with the method for HPLC (%A: % ultrapure water + 0.1% TFA). The DA-RV adduct was identified by absorbance at 425 nm and elutes at 22.7 min (#). This compound was recovered for further analysis by ESI-MS, NMR, ATR-FTIR, and UV-Vis spectroscopy.

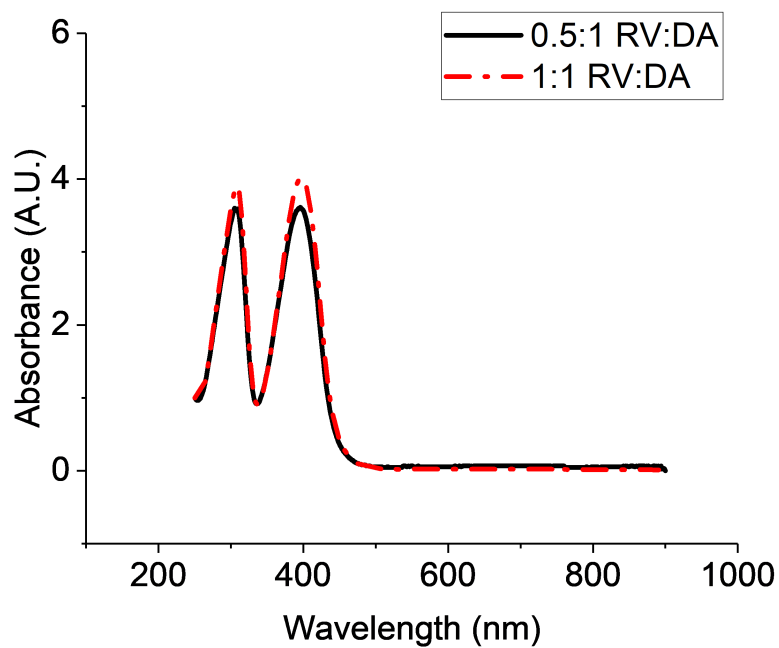

**Figure S7:** UV-Vis absorbance spectra of the dopamine-resveratrol adduct after purification by semiprep HPLC. The two curves shown correspond to product isolated from adduct formation in two reaction conditions (0.5:1 RV:DA and 1:1 RV:DA mass ratios). Both curves have absorbance maxima at  $\lambda_{\text{abs}} = 309$  nm and  $\lambda_{\text{abs}} = 398$  nm.

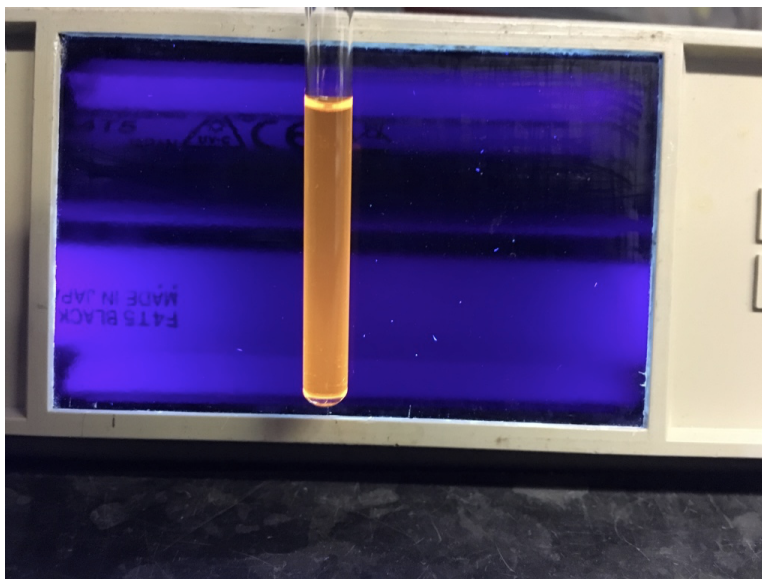

**Figure S8:** Fluorescence of pure dopamine-resveratrol adduct under long wave UV irradiation at 1 mg/mL in DMSO-d<sub>6</sub>.



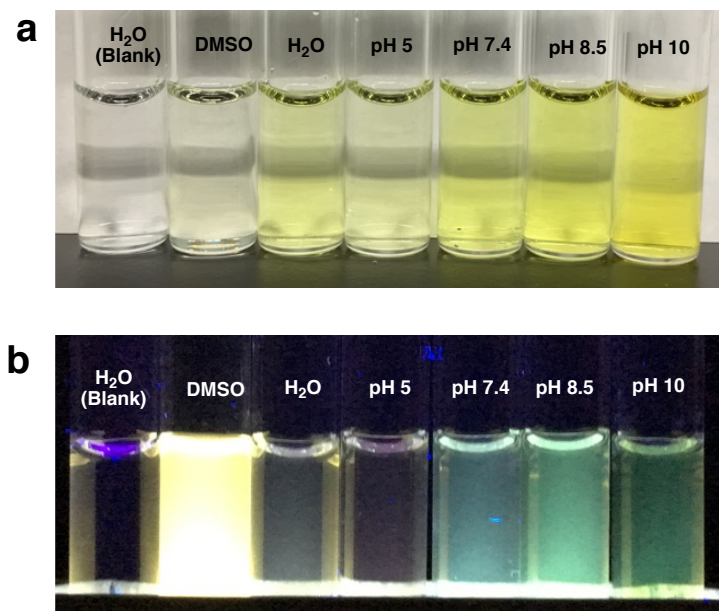

**Figure S9:** Optical properties of various resveratrol-dopamine adduct solutions at 0.02 mg/mL. Water blank is for visual reference. Samples were prepared by dilution of 1 mg/mL stock in DMSO- $d_6$  into the appropriate diluent. (a) Visible light image of solutions, (b) samples under longwave UV illumination. Buffer compositions were 0.1 M acetate (pH 5), 1x PBS (pH 7.4), 0.1 M bicine (pH 8.5), and 0.1 M sodium carbonate (pH 10).

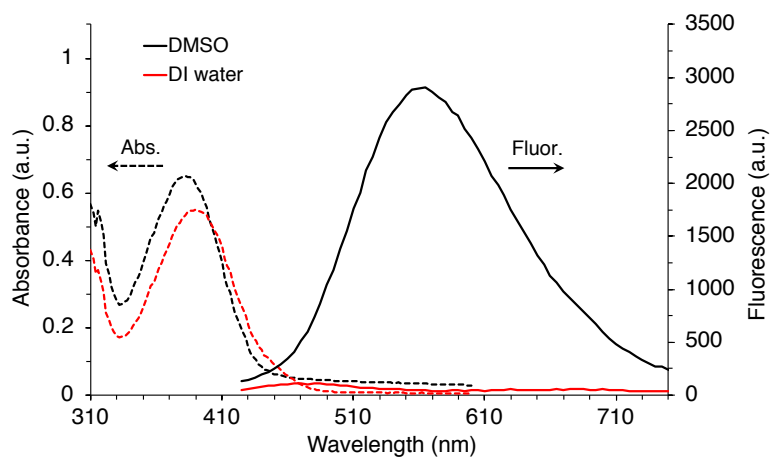

**Figure S10:** Absorbance and fluorescence spectra of 0.2 mg/mL dopamine-resveratrol adduct solutions in unbuffered DMSO and DI water (also pictured in Figure S9). Solutions were prepared from the trifluoroacetate salt of the adduct, isolated by semi-preparative HPLC in the presence of trifluoroacetic acid. Dotted lines represent absorbance (left axis), and solid lines represent emission (right axis, excitation at 390 nm).

<sup>1</sup>H NMR (900 MHz, DMSO-*d*<sub>6</sub>) δ 10.86 (s, 1H, HO-C11), 9.81 (s, 1H, HO-C22), 9.41 (bs, 2H, NH<sub>2</sub>•TFA), 7.85 (bs, 1H, HO-C4), 7.53 (d, *J* = 8.6 Hz, 2H, H20), 7.21 (d, *J* = 16.1 Hz, 1H, H17), 7.18 (d, *J* = 16.0 Hz, 1H, H18), 6.82 (d, *J* = 8.5 Hz, 2H, H21), 6.80 (d, *J* = 1.9 Hz, 1H, H10), 6.38 (d, *J* = 2.0 Hz, 1H, H12), 6.36 (s, 1H, H6), 3.28 (dd, *J* = 14.0, *J* = 5.6 Hz, 1H, H2a), 3.12 (app td, *J* = 13.7, *J* = 4.2 Hz, 1H, H2b), 2.70 (d, *J* = 12.0 Hz, 1H, H16a), 2.61 (dd, *J* = 11.9, 2.3 Hz, 1H, H16b), 2.16 (app td, *J* = 13.4, 5.7 Hz, 1H, H1a), 1.82 (app d, *J* = 13.2 Hz, 1H, H1b). <sup>13</sup>C NMR (226 MHz, DMSO) δ 188.61 (C5), 166.09 (C13), 165.20 (C11), 164.14 (C7), 158.37 (C22), 139.91 (C9), 134.07 (C18), 128.89 (C20), 127.20 (C19), 120.09 (H17), 115.74 (C21), 113.48 (C6), 110.29 (C8), 107.66 (C10), 96.66 (C12), 86.79 (C4), 82.77 (C15), 43.48 (C16), 36.44 (C2), 29.13 (C1).

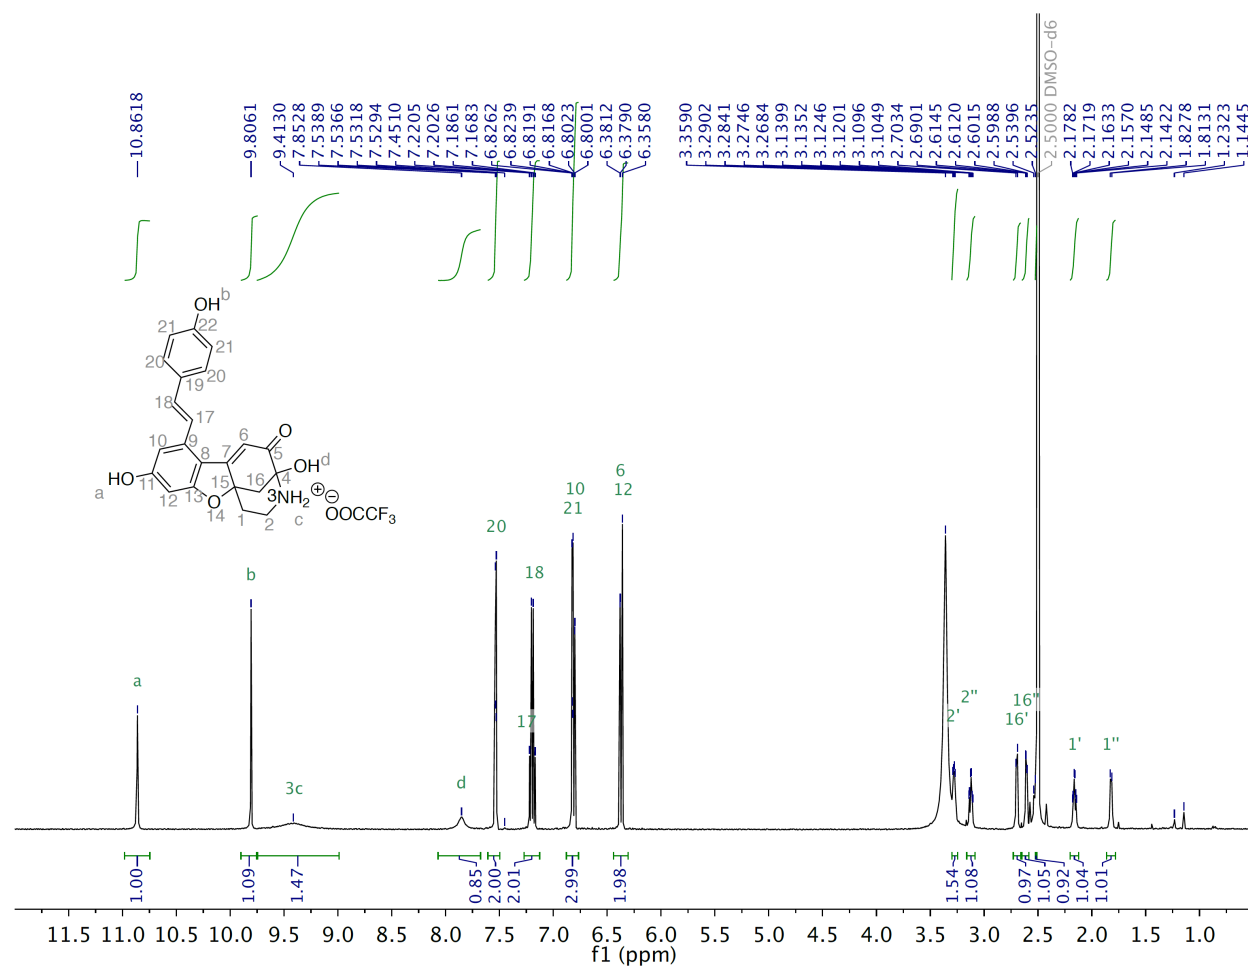

**Figure S11:** <sup>1</sup>H-NMR spectrum of isolated DA-RV adduct.

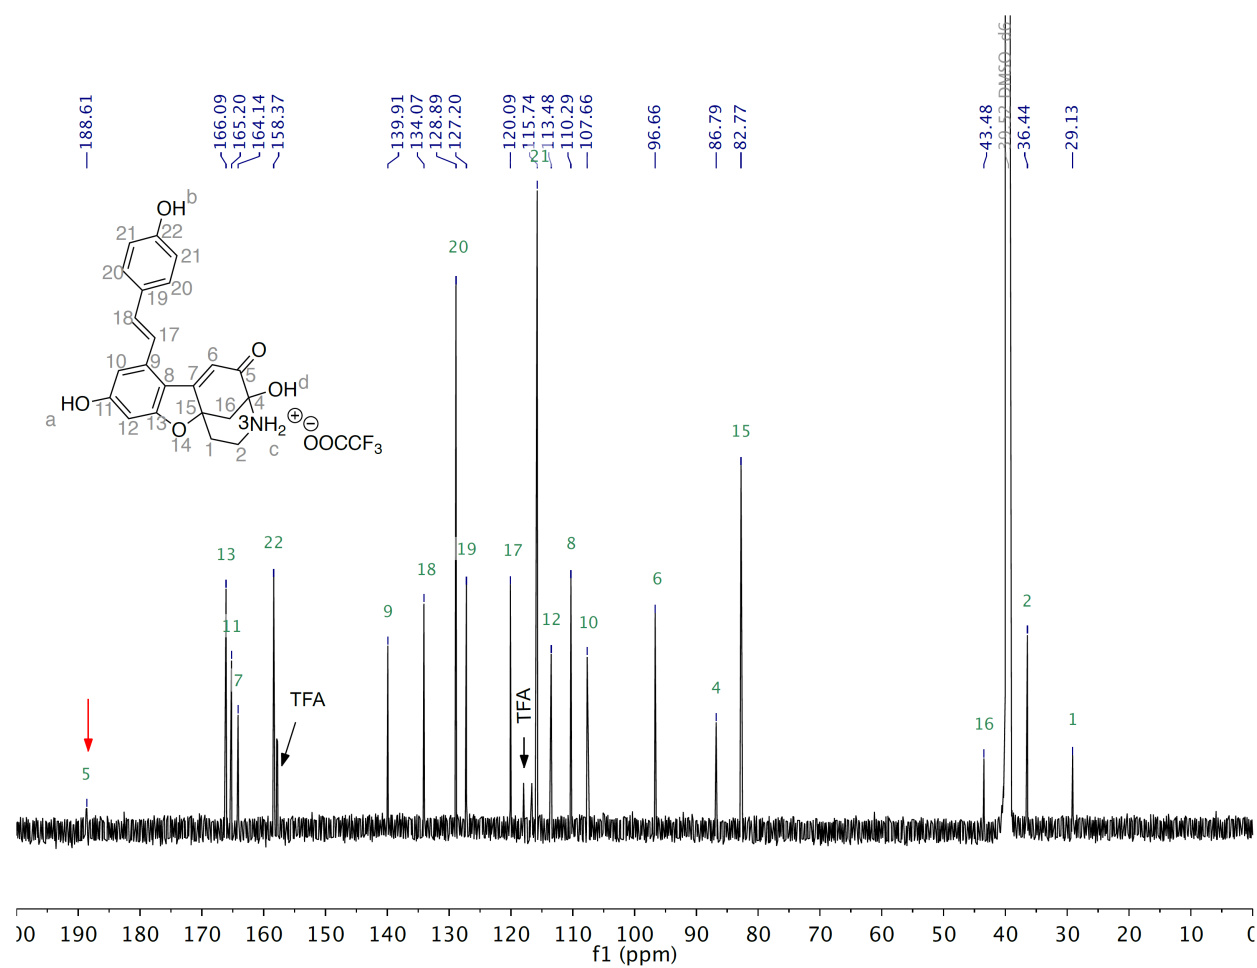

**Figure S12:**  $^{13}\text{C}$ -NMR spectrum of isolated DA-RV adduct.

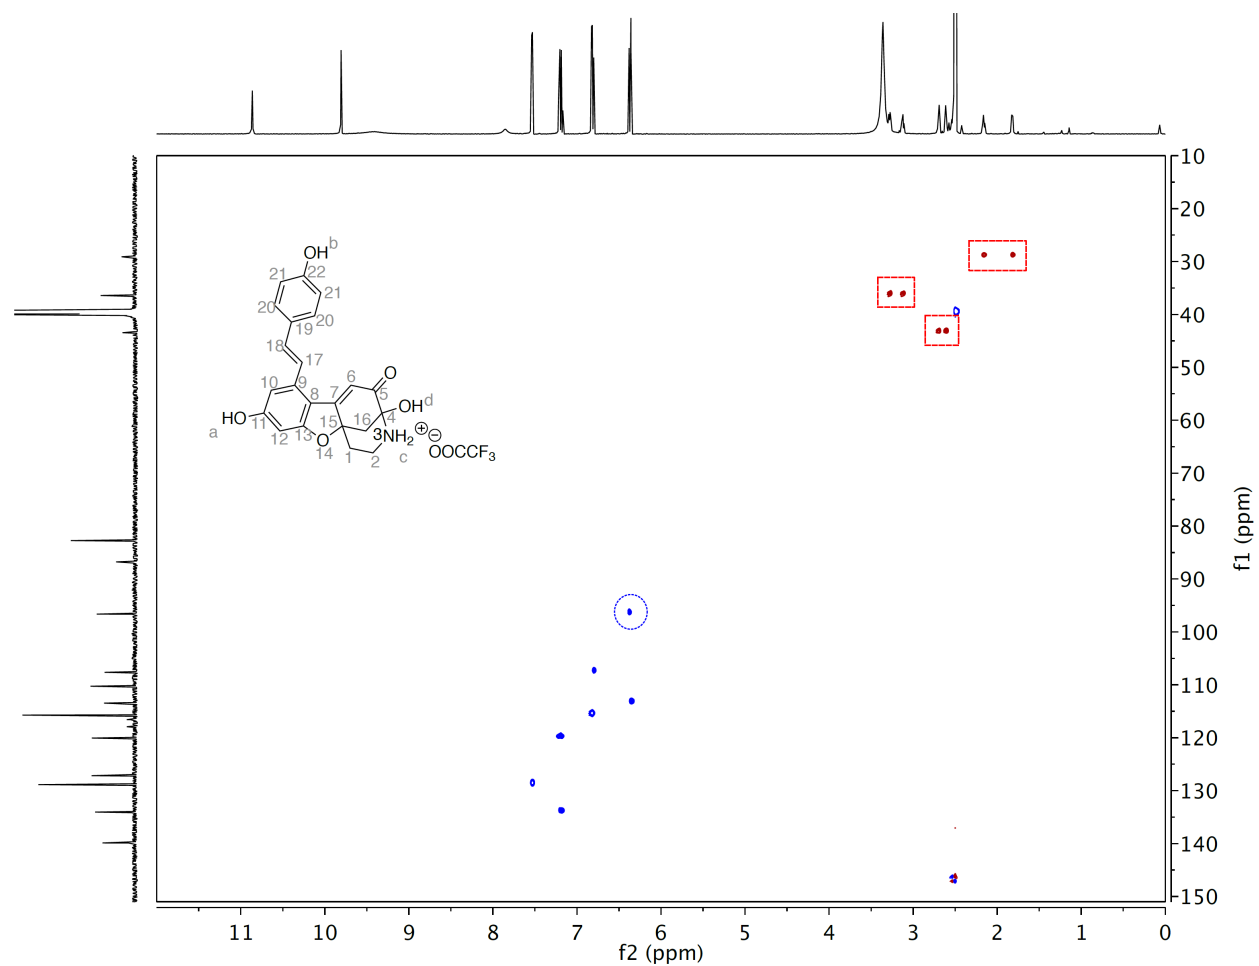

**Figure S13:**  $^1\text{H}$ - $^{13}\text{C}$  HSQC spectrum of isolated DA-RV adduct. Spectrum supports the presence of three methylene groups (red dashed boxes). Correlation of H6 and C6 is indicated by the blue dashed circle.

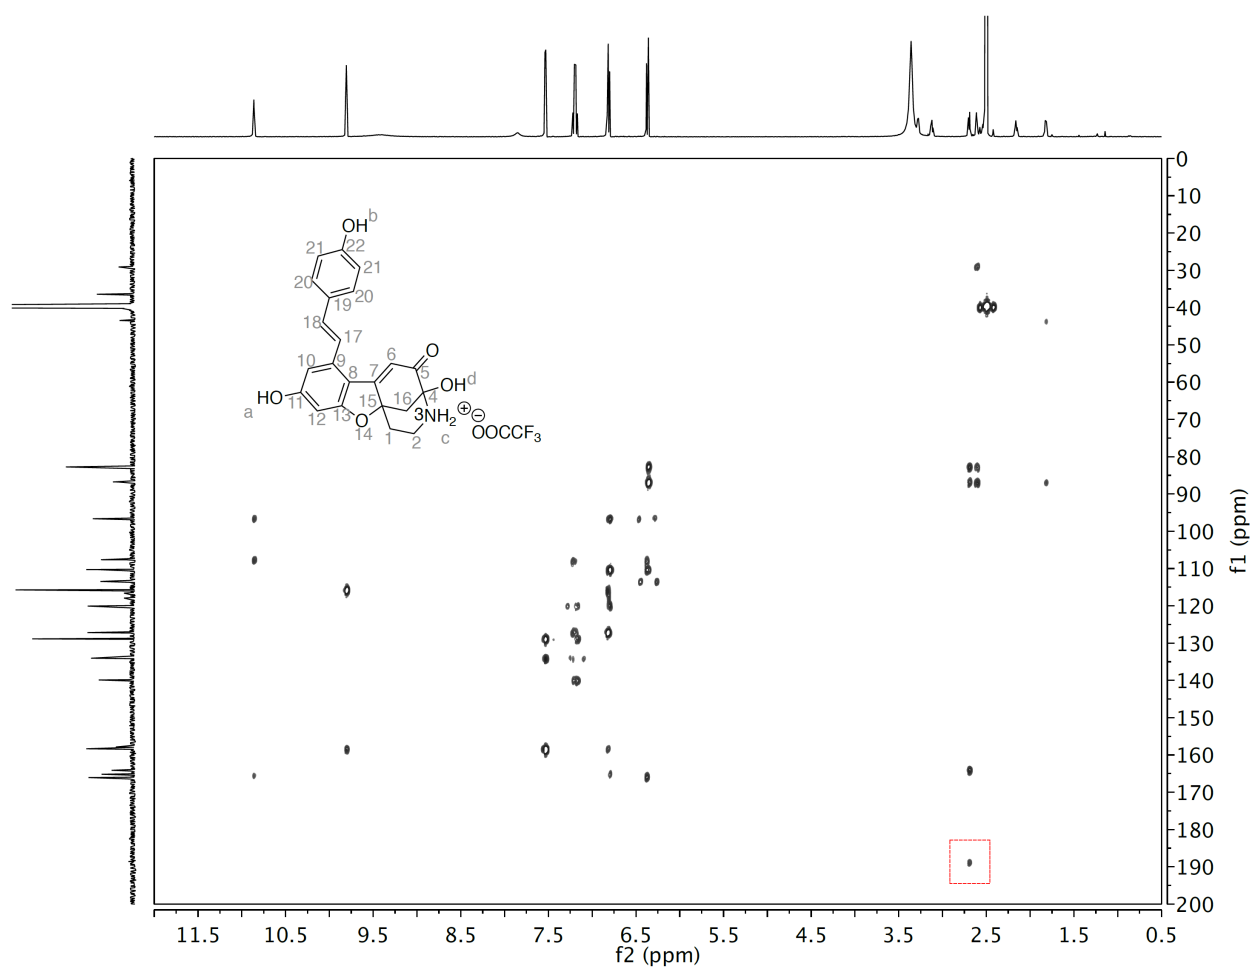

**Figure S14:**  $^1\text{H}$ - $^{13}\text{C}$  HMBC spectrum of isolated DA-RV adduct. Correlation between carbonyl C5 and proton H16'' is indicated by the red dashed box.

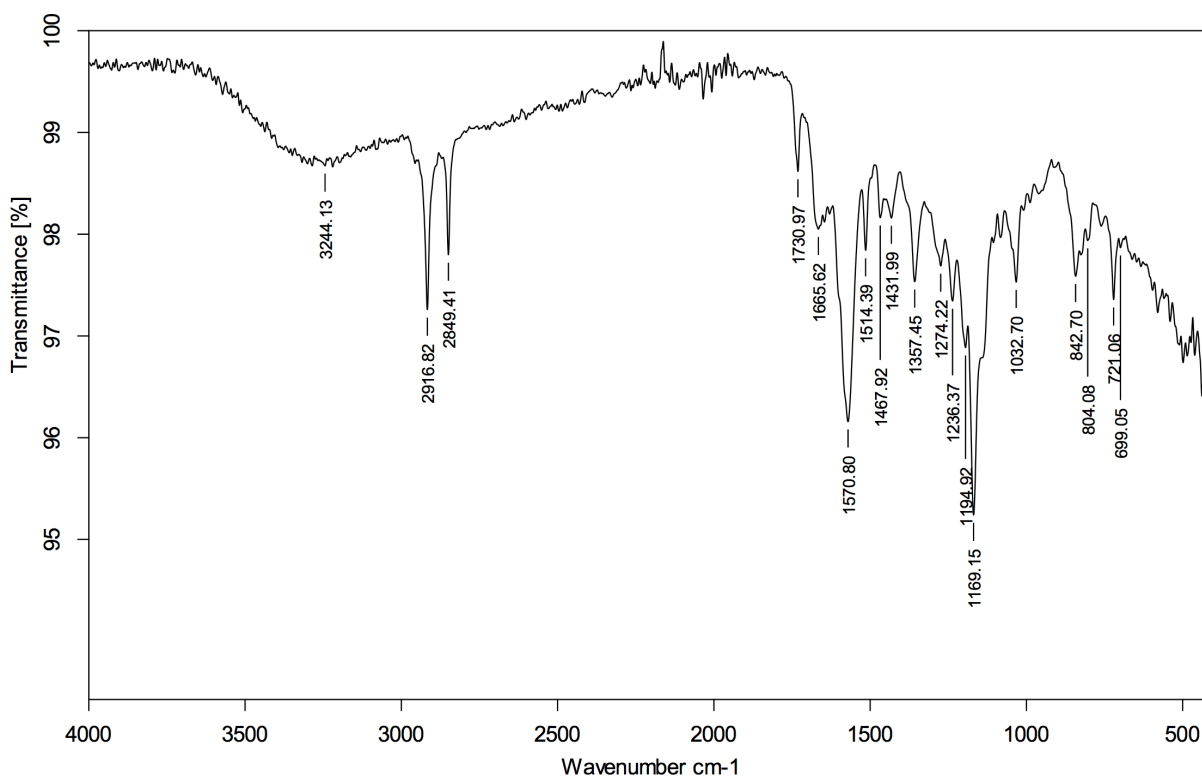

**Figure S15:** ATR-FTIR spectrum of solid HPLC-purified DA-RV adduct (256 scans).

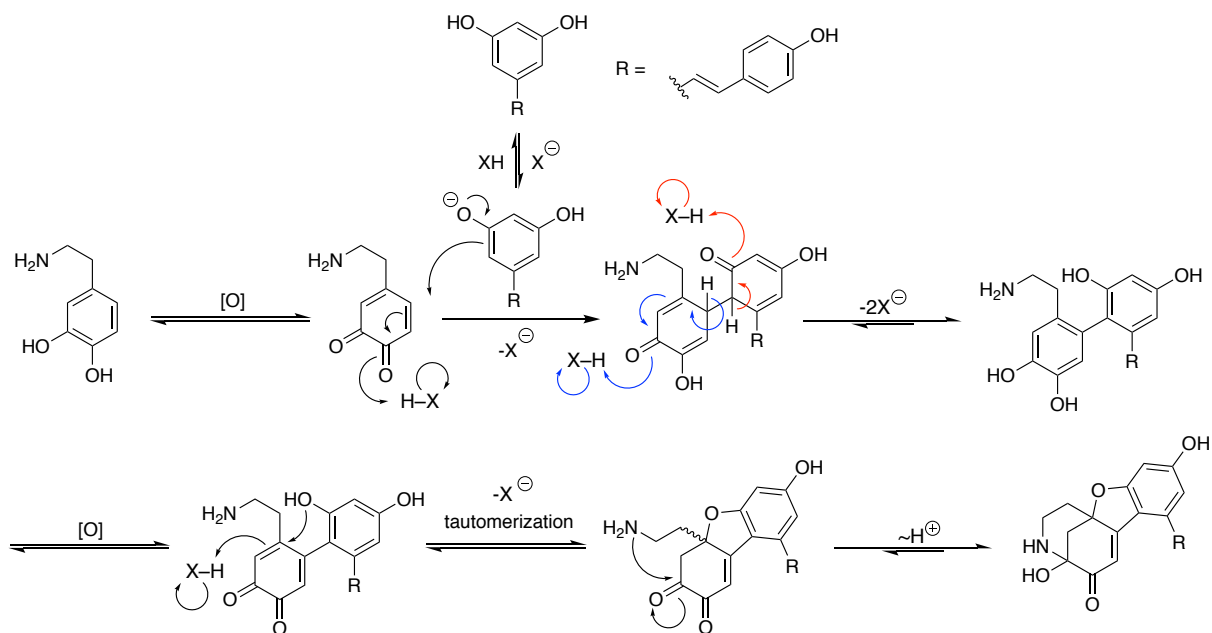

**Figure S16:** Plausible mechanism for formation of azamonardine DA-RV adduct.
